# Supplementary material
Source: MDPI journal article supplement (https://www.mdpi.com/2073-445X/10/11/1268)
Supplement: s1 [file s1]

## Supplementary materials

**Table S1.** Correlation test for independent variables (total respondents).

|                            | <i>Willingness to contribute</i> | <i>Age</i> | <i>Gender</i> | <i>Marital status</i> | <i>Children number</i> | <i>Education</i> | <i>Residence duration</i> | <i>Household income</i> | <i>Housing type</i> |
|----------------------------|----------------------------------|------------|---------------|-----------------------|------------------------|------------------|---------------------------|-------------------------|---------------------|
| Willingness to participate | 1                                |            |               |                       |                        |                  |                           |                         |                     |
| Age                        | -0.113                           | 1          |               |                       |                        |                  |                           |                         |                     |
| Gender                     | -0.023                           | 0.104      | 1             |                       |                        |                  |                           |                         |                     |
| Marital status             | 0.052                            | -0.167     | -0.046        | 1                     |                        |                  |                           |                         |                     |
| Children number            | -0.036                           | 0.131      | 0.125         | -0.447                | 1                      |                  |                           |                         |                     |
| Education                  | 0.151                            | -0.123     | 0.147         | -0.074                | -0.009                 | 1                |                           |                         |                     |
| Residence duration         | -0.101                           | 0.424      | 0.044         | -0.021                | -0.010                 | -0.096           | 1                         |                         |                     |
| Household income           | 0.021                            | 0.059      | -0.108        | -0.222                | 0.186                  | 0.258            | -0.003                    | 1                       |                     |
| Housing type               | 0.119                            | -0.127     | -0.006        | -0.026                | -0.048                 | 0.439            | -0.222                    | 0.322                   | 1                   |

**Table S2.** Correlation test for independent variables (ger area respondents).

|                          | <i>Willing. to land sharing</i> | <i>Age</i> | <i>Gender</i> | <i>Marital status</i> | <i>Children number</i> | <i>Educa- tion</i> | <i>Housing type</i> | <i>Residence duration</i> | <i>Household income</i> | <i>Land size</i> |
|--------------------------|---------------------------------|------------|---------------|-----------------------|------------------------|--------------------|---------------------|---------------------------|-------------------------|------------------|
| Willing. to land sharing | 1                               |            |               |                       |                        |                    |                     |                           |                         |                  |
| Age                      | 0.010                           | 1          |               |                       |                        |                    |                     |                           |                         |                  |
| Gender                   | 0.061                           | -0.010     | 1             |                       |                        |                    |                     |                           |                         |                  |
| Marital status           | 0.117                           | 0.440      | 0.252         | 1                     |                        |                    |                     |                           |                         |                  |
| Children number          | 0.069                           | 0.089      | 0.202         | 0.374                 | 1                      |                    |                     |                           |                         |                  |
| Education                | 0.134                           | -0.131     | 0.227         | 0.028                 | -0.037                 | 1                  |                     |                           |                         |                  |
| Housing type             | -0.033                          | -0.046     | -0.082        | -0.071                | -0.049                 | 0.192              | 1                   |                           |                         |                  |
| Residence duration       | 0.119                           | 0.502      | -0.055        | 0.198                 | -0.077                 | 0.010              | 0.012               | 1                         |                         |                  |
| Income                   | 0.057                           | 0.049      | -0.204        | -0.035                | 0.166                  | 0.186              | 0.178               | 0.063                     | 1                       |                  |
| Land size                | 0.221                           | -0.071     | 0.086         | 0.027                 | 0.077                  | 0.046              | 0.144               | -0.002                    | -0.111                  | 1                |

**Table S3.** Socio-demographic characteristics of the respondents by residential category.

| Variable                      | Category                        | By residential category (N=535) |                          |                      |
|-------------------------------|---------------------------------|---------------------------------|--------------------------|----------------------|
|                               |                                 | Ger area                        |                          | Built-up area        |
|                               |                                 | Ger dwelling<br>(N=100)         | Baishin house<br>(N=137) | Apartment<br>(N=298) |
| Age                           | Minimum                         | 17                              | 18                       | 17                   |
|                               | Mean                            | 37.2                            | 37.1                     | 33.8                 |
|                               | Median                          | 34.5                            | 35                       | 32                   |
|                               | Maximum                         | 78                              | 70                       | 68                   |
| Gender                        | Male                            | 37 (37%)                        | 62 (45.2%)               | 119 (40%)            |
|                               | Female                          | 63 (63%)                        | 75 (54.7%)               | 179 (60%)            |
| Marital status                | Married                         | 68 (68%)                        | 98 (71.5%)               | 207 (69.5%)          |
|                               | Single                          | 24 (24%)                        | 34 (24.8%)               | 79 (26.5%)           |
|                               | Separated (widower or divorced) | 8 (8%)                          | 5 (3.6%)                 | 12 (4%)              |
| Education level               | Primary                         | 3 (3%)                          | 0 (0%)                   | 2 (0.7%)             |
|                               | Secondary                       | 36 (36%)                        | 40 (29.2%)               | 15 (5%)              |
|                               | College/vocational              | 24 (24%)                        | 21 (15.3%)               | 18 (6%)              |
|                               | University or higher            | 37 (37%)                        | 76 (55.5%)               | 263 (88.3%)          |
| Household income<br>(US \$) * | 118.1-369                       | 38 (38%)                        | 36 (26.3%)               | 35 (11.7%)           |
|                               | 369.1-738                       | 52 (52%)                        | 69 (50.4%)               | 135 (45.3%)          |
|                               | 738.1-1107                      | 8 (8%)                          | 25 (18.2%)               | 95 (31.9%)           |
|                               | >1107                           | 2 (2%)                          | 7 (5.1%)                 | 33 (11.1%)           |
| Number of children            | Minimum                         | 0                               | 2                        | 1                    |
|                               | Mean                            | 1.6                             | 3.3                      | 3.8                  |
|                               | Median                          | 1                               | 4                        | 4                    |
|                               | Maximum                         | 6                               | 4                        | 4                    |
| Duration of<br>residence      | Minimum                         | 1                               | 1                        | 1                    |
|                               | Mean                            | 10                              | 10.7                     | 6.2                  |
|                               | Median                          | 7                               | 10                       | 4                    |
|                               | Maximum                         | 46                              | 40                       | 47                   |
| Land size (m <sup>2</sup> )   | ≤ 300                           | 43 (43%)                        | 31 (22.3%)               | Not applicable       |
|                               | 301-400                         | 17 (17%)                        | 20 (14.6%)               |                      |
|                               | 401-500                         | 10 (10%)                        | 16 (11.7%)               |                      |
|                               | 501-600                         | 7 (7%)                          | 20 (14.6%)               |                      |
|                               | 601-700                         | 16 (16%)                        | 34 (24.%)                |                      |
|                               | ≥ 701                           | 7 (7%)                          | 16 (11.7%)               |                      |

\* Currency rate by November 28, 2019 in Mongolia.
